# Supplementary figures and images for: Identification of amino acid metabolism-based molecular subtypes and prognostic signature to predict immune landscape and guide clinical drug treatment in osteosarcoma
Source: Research Square preprint supplement (doi:10.21203/rs.3.rs-7107108/v1), 2025-12-08

**Figure S1**


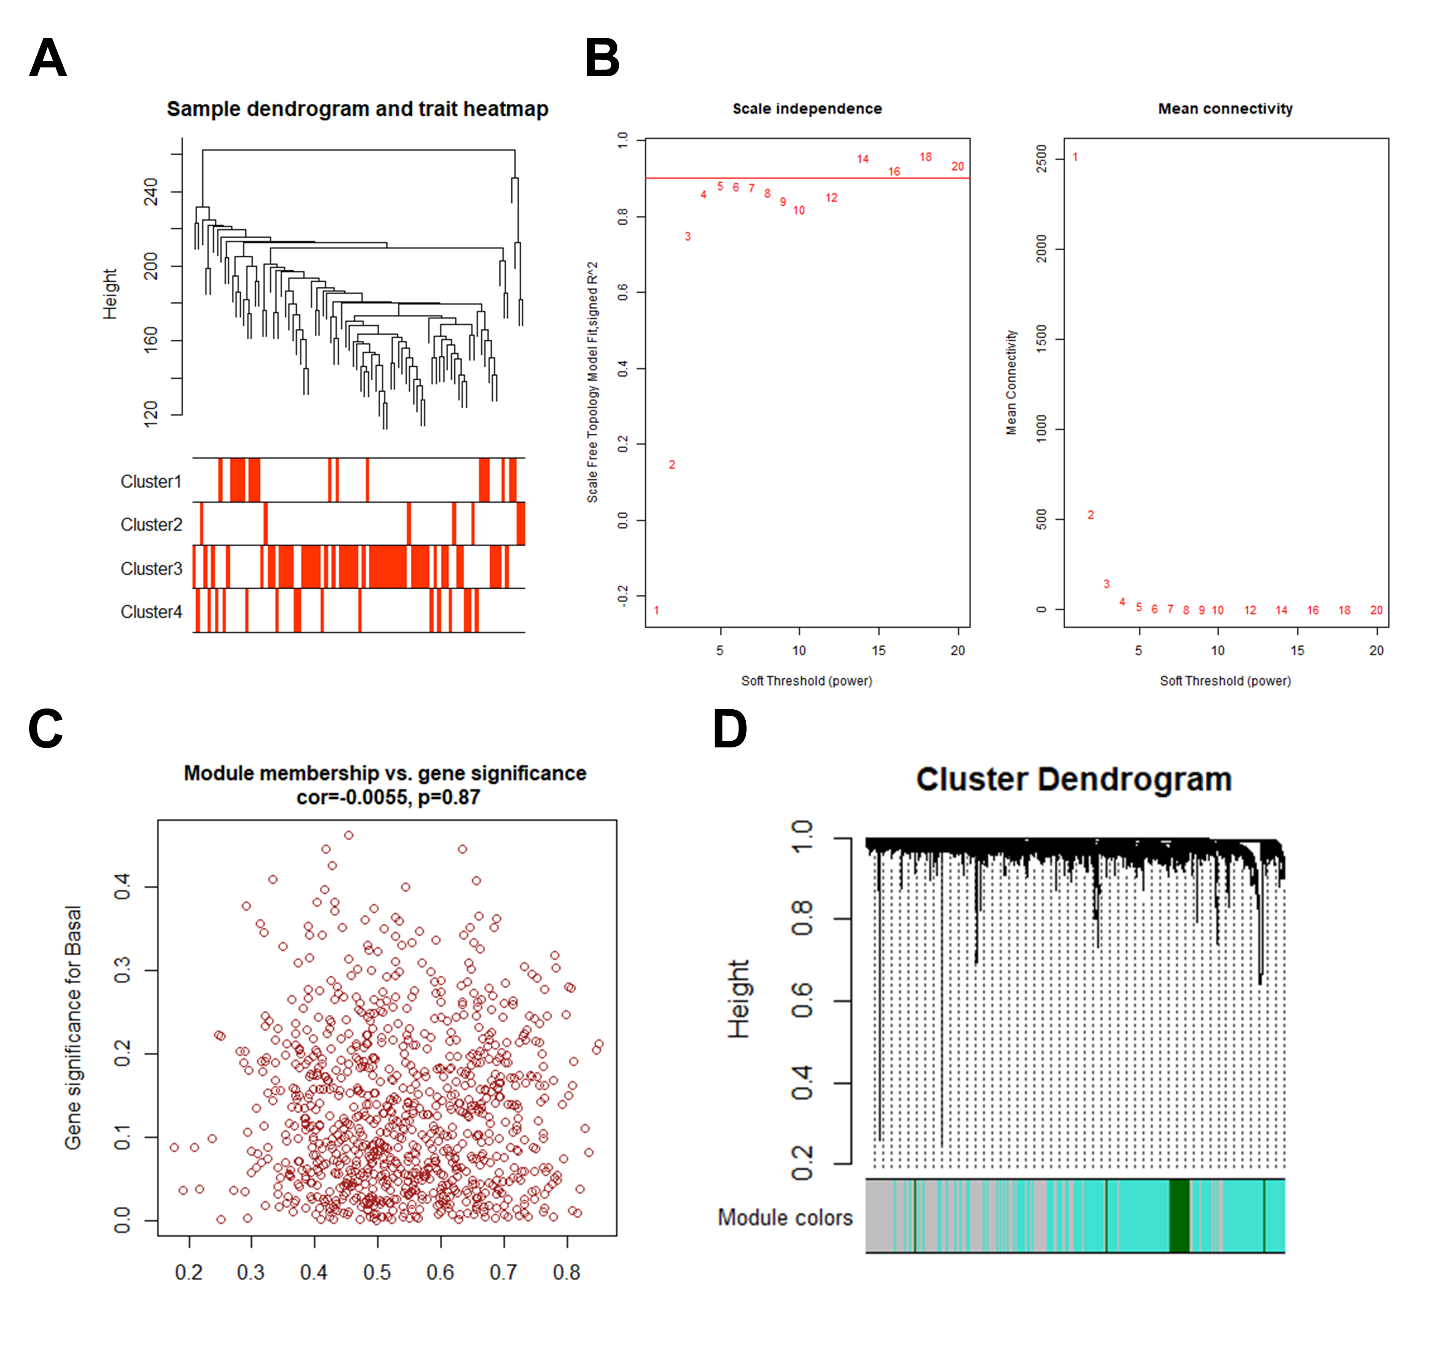


**Figure S2**


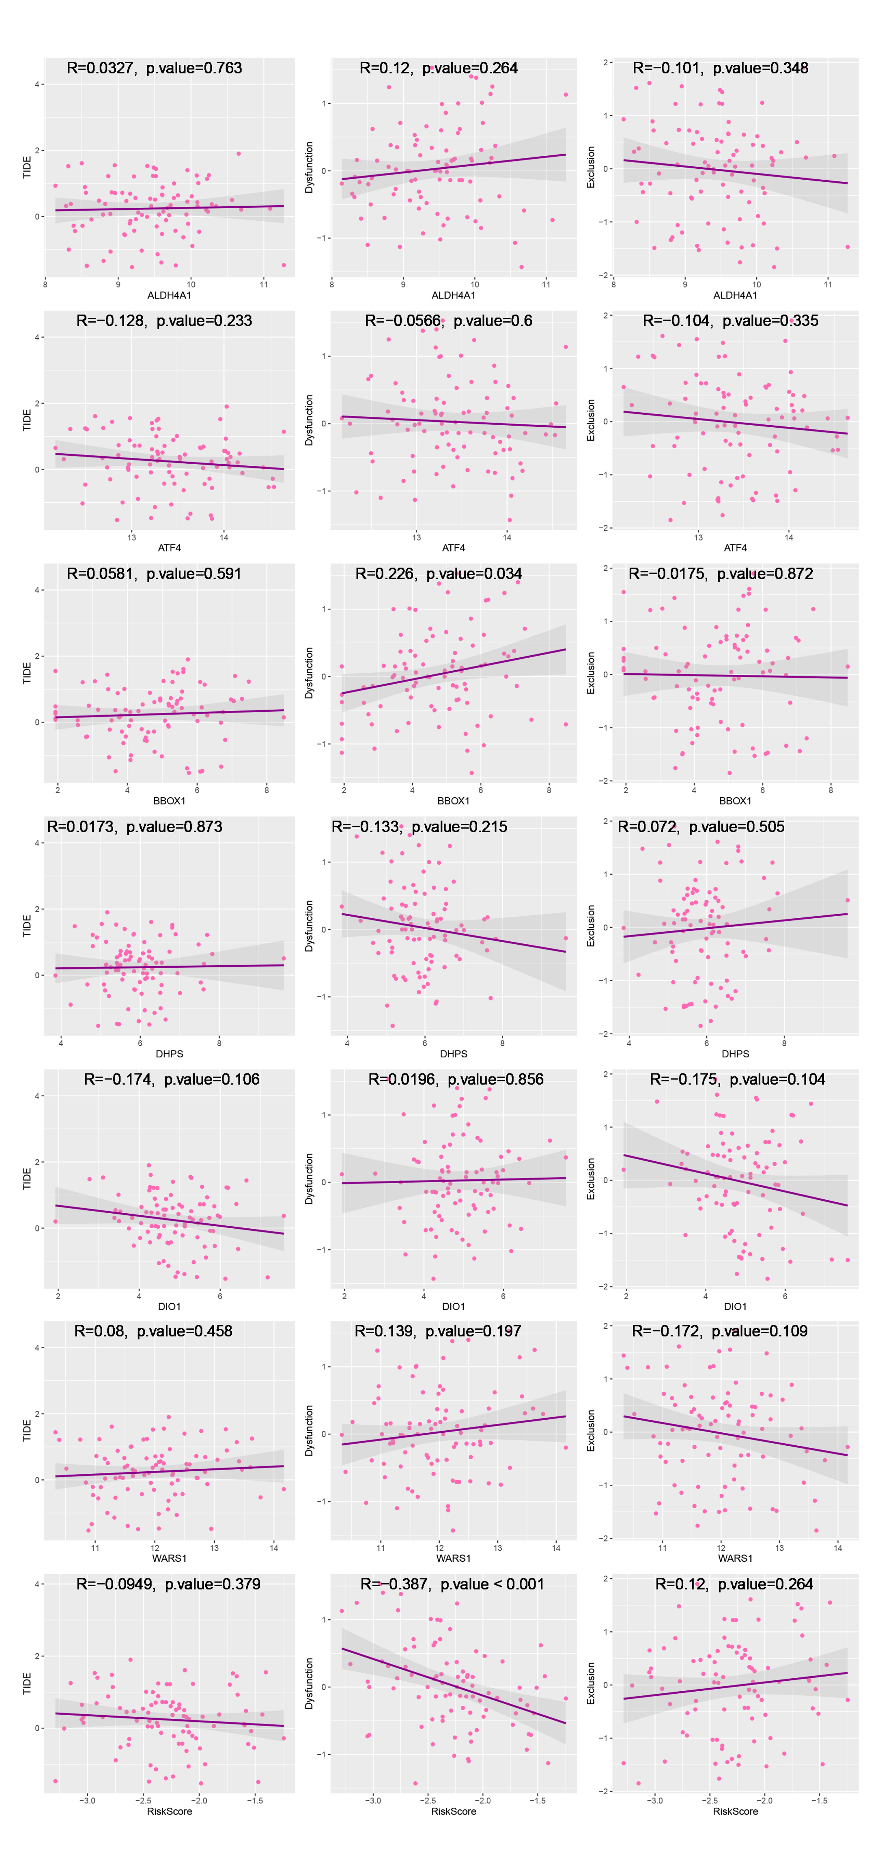


**Figure S3**


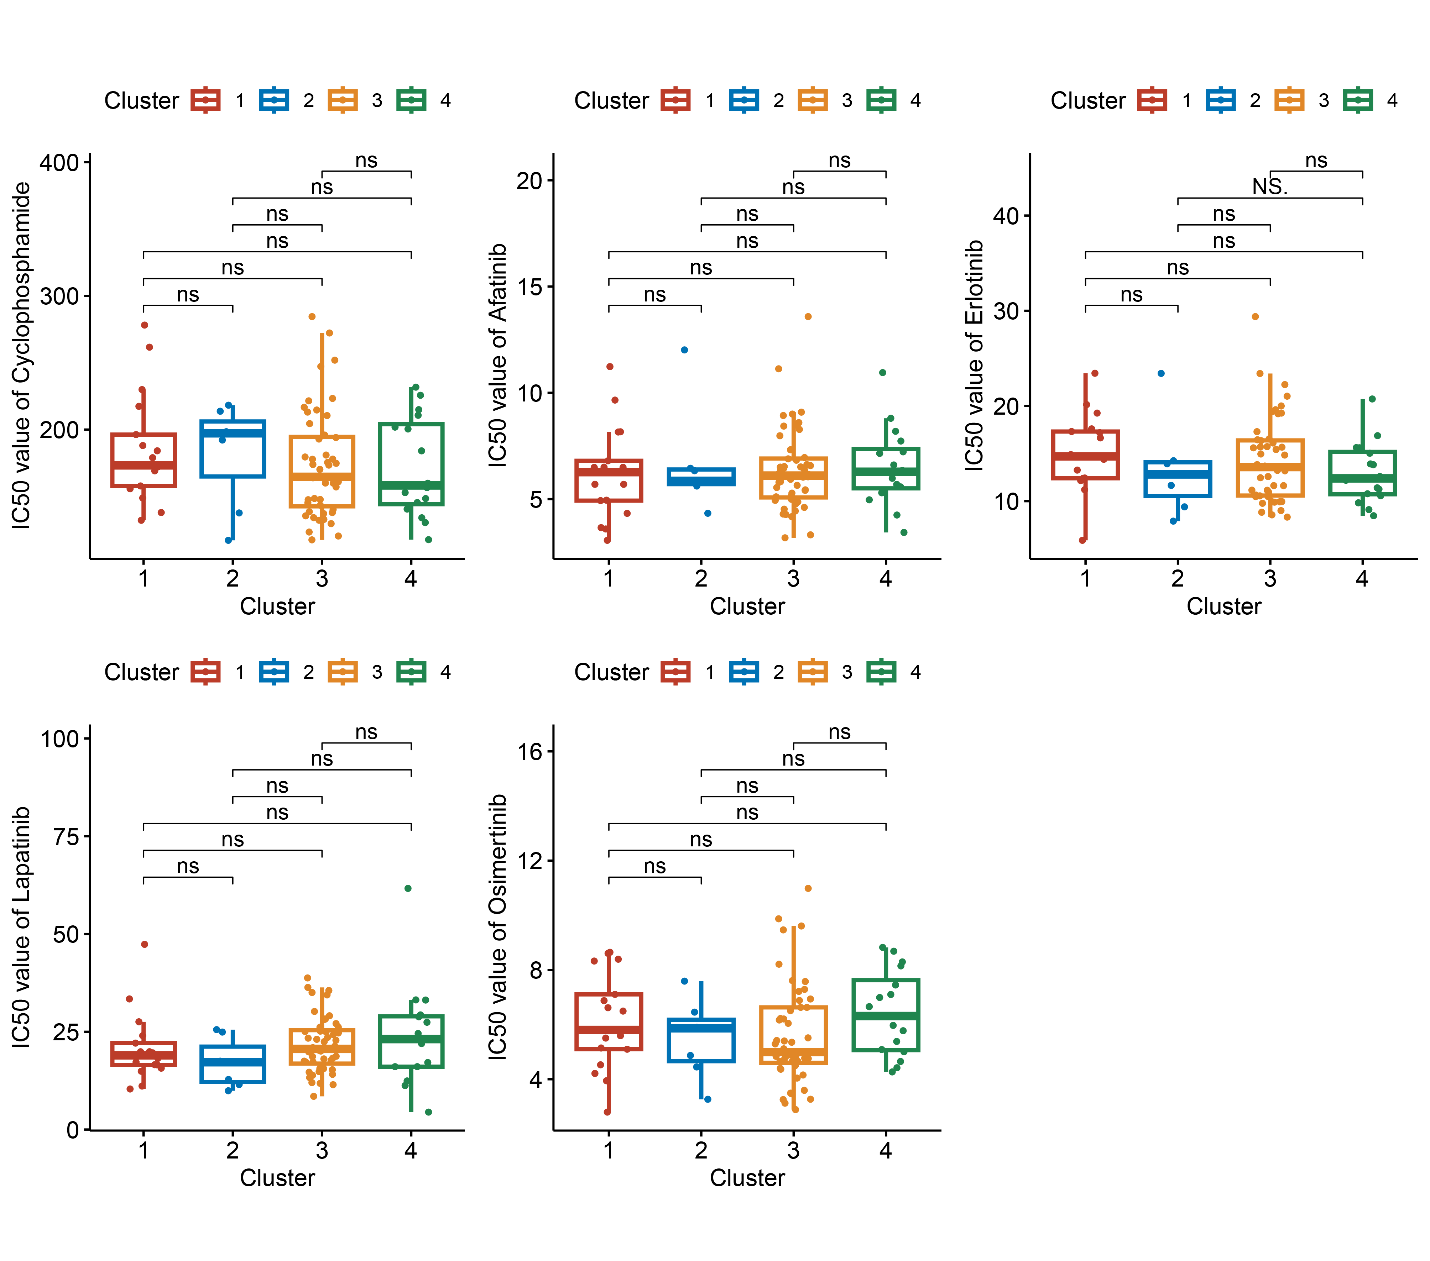

Supplement: Supplementary file 1 [file d8915398f64f4a7c6f38804f.docx]
